# Supplementary material for: Finding Predictors of Leg Defects in Pigs Using CNV-GWAS
Source: Genes (Basel). 2023 Nov 8;14(11):2054. doi: 10.3390/genes14112054 (PMC10671522; doi:10.3390/genes14112054)
Supplement: Supplementary file 1 [file genes-14-02054-s001.zip › Supplementary file 2. CNVR in Large White pigs.txt]

seqnames	start	end	width	type
1	17748224	19542020	1793797	gain
1	23068914	23976580	907667	gain
1	34280640	37401594	3120955	gain
1	41300464	42881624	1581161	gain
1	45370571	49495795	4125225	gain
1	61628730	65474177	3845448	gain
1	66709510	71004780	4295271	gain
1	73163624	74119179	955556	gain
1	75060242	77203186	2142945	gain
1	83524394	87967508	4443115	gain
1	88322087	91705268	3383182	gain
1	115884118	119302575	3418458	gain
1	134440592	136735925	2295334	gain
1	172806698	178420112	5613415	gain
1	208401672	214485419	6083748	gain
1	215847916	217343098	1495183	gain
1	224826959	226879335	2052377	gain
1	233027655	235598550	2570896	gain
1	244586907	245815995	1229089	gain
1	262736524	262993485	256962	gain
1	269763787	270081546	317760	loss
1	270138975	274315671	4176697	gain
2	2916135	2965646	49512	loss
2	3803579	7004047	3200469	gain
2	12884978	14303735	1418758	gain
2	14499961	14533107	33147	loss
2	22095761	24179887	2084127	gain
2	24765926	26792270	2026345	gain
2	28455008	32486228	4031221	gain
2	33924892	35775180	1850289	gain
2	41456213	45201441	3745229	gain
2	47862404	49306110	1443707	gain
2	52753366	54394882	1641517	gain
2	58150443	58200984	50542	loss
2	91070076	94633673	3563598	gain
2	96622232	99837332	3215101	gain
2	113554653	114613136	1058484	gain
2	116267027	118317380	2050354	gain
2	119406710	120996301	1589592	gain
2	122053061	125855706	3802646	gain
2	123535433	126039785	2504353	gain
2	124185562	125006692	821131	gain
2	127380342	130045766	2665425	gain
2	132239424	134066133	1826710	gain
2	142062945	142177471	114527	loss
3	7761433	7797914	36482	loss
3	21596427	21649613	53187	gain
3	22497737	25217690	2719954	gain
3	39763531	41359188	1595658	gain
3	60211109	61635457	1424349	gain
3	62316068	66544996	4228929	gain
3	73540365	74194664	654300	gain
3	85912719	88836733	2924015	gain
3	87301517	89899482	2597966	gain
3	99251721	101087543	1835823	gain
3	104344407	110251234	5906828	gain
3	118726339	119287305	560967	gain
3	120075138	120677328	602191	gain
3	123404335	123460528	56194	loss
4	415271	1564132	1148862	gain
4	16944824	18069786	1124963	gain
4	23101516	27737986	4636471	gain
4	31955589	33003968	1048380	gain
4	32030368	34050082	2019715	gain
4	36301173	39249883	2948711	gain
4	56803641	61255905	4452265	gain
4	67460687	67923380	462694	gain
4	67460687	68580257	1119571	gain
4	91183159	93227788	2044630	gain
4	96099498	96869301	769804	gain
4	98744529	99876131	1131603	gain
4	100444573	101317661	873089	gain
4	113628908	116262155	2633248	gain
4	114770647	116524732	1754086	gain
4	127341468	127373937	32470	gain
4	127379776	127379842	67	loss
4	127749186	130822336	3073151	gain
5	222125	1640085	1417961	gain
5	14236869	15997122	1760254	gain
5	19879099	20994014	1114916	both
5	20381148	20430990	49843	both
5	20381148	20561805	180658	both
5	20866295	20994014	127720	gain
5	24640366	27265206	2624841	gain
5	31409845	33161683	1751839	gain
5	35398661	38327567	2928907	gain
5	40249391	42816657	2567267	gain
5	51750888	56132041	4381154	gain
5	61669599	62134657	465059	gain
5	87226207	87269142	42936	both
5	87226207	87297254	71048	both
5	102632243	104477606	1845364	gain
6	11232025	11906230	674206	gain
6	15279068	15696875	417808	gain
6	45671421	47357966	1686546	gain
6	51639645	53301047	1661403	gain
6	119678992	121706879	2027888	gain
6	122508849	125740523	3231675	gain
6	126370517	127618187	1247671	gain
6	130405360	131101648	696289	gain
6	139085881	141730150	2644270	gain
6	139594664	143647364	4052701	gain
6	142358005	143865882	1507878	gain
6	142484811	142872139	387329	gain
6	149710613	150356811	646199	gain
6	152368013	152746637	378625	gain
6	159671132	162528311	2857180	gain
6	166727255	170802600	4075346	gain
7	155975	3676156	3520182	gain
7	6168501	6644634	476134	gain
7	10793334	11058567	265234	loss
7	33326341	34374643	1048303	gain
7	37460511	39001990	1541480	gain
7	41399335	41421371	22037	loss
7	46081552	49073136	2991585	gain
7	71626349	72892507	1266159	gain
7	94497180	95772734	1275555	gain
7	96419755	96486130	66376	loss
7	104803311	106265566	1462256	gain
7	108076913	108839186	762274	gain
7	116538108	116582752	44645	loss
7	118289948	121782508	3492561	gain
8	22334479	26263157	3928679	gain
8	33430348	37231380	3801033	gain
8	62048822	66234781	4185960	gain
8	77326183	78211279	885097	loss
8	90793458	95543688	4750231	gain
8	97865933	99362844	1496912	gain
8	101683644	102209143	525500	gain
8	106998282	107064983	66702	loss
8	115001081	118189172	3188092	both
8	122677857	124919219	2241363	gain
8	126014788	127136906	1122119	gain
8	126502620	128124101	1621482	gain
8	126502620	129447874	2945255	gain
9	14949049	18989178	4040130	gain
9	23954127	26349127	2395001	gain
9	28748248	33216938	4468691	gain
9	61554222	62825031	1270810	gain
9	68449453	73132103	4682651	gain
9	83016928	86395303	3378376	gain
9	87084016	90619741	3535726	gain
9	93556645	96521575	2964931	gain
9	93556645	98554861	4998217	gain
9	104625702	106963764	2338063	gain
9	107919929	110717015	2797087	gain
9	111410418	113703227	2292810	gain
9	127116045	127910337	794293	gain
9	128431815	129887068	1455254	gain
10	171512	3160077	2988566	gain
10	4151645	4227791	76147	loss
10	32654904	38091967	5437064	gain
10	54361862	55188206	826345	gain
10	62003873	62417521	413649	gain
11	7171602	9145811	1974210	gain
11	10866493	11756576	890084	gain
11	13019593	14005287	985695	gain
11	25075292	26180433	1105142	gain
11	27479379	31296557	3817179	gain
11	33903831	38684777	4780947	gain
11	40380825	41772581	1391757	gain
11	43146206	44067208	921003	gain
11	54111454	59549871	5438418	gain
11	64563378	64648287	84910	both
11	64611143	64648287	37145	both
11	64793488	64822422	28935	gain
11	64793488	64974334	180847	gain
11	77085643	77241741	156099	loss
11	77286792	79072521	1785730	gain
12	27024	1461135	1434112	gain
12	10862797	11893603	1030807	gain
12	12608111	15390116	2782006	gain
12	26677716	31202633	4524918	gain
12	44852605	48613760	3761156	gain
13	5650800	6472969	822170	gain
13	7228733	7977644	748912	gain
13	8991896	12758171	3766276	gain
13	15461954	16564685	1102732	gain
13	21749563	21820029	70467	loss
13	40186686	43157389	2970704	gain
13	72796721	73510043	713323	loss
13	73664860	75314780	1649921	gain
13	82957684	84610744	1653061	gain
13	91096639	95461928	4365290	gain
13	101738890	106006697	4267808	gain
13	127066599	128961293	1894695	gain
13	138082770	140110976	2028207	gain
13	149881858	153236721	3354864	gain
13	153863343	158648627	4785285	gain
13	168450509	172178785	3728277	gain
13	183490990	184783513	1292524	gain
13	183490990	187772804	4281815	gain
13	190975246	193548240	2572995	gain
13	194336558	194570317	233760	gain
13	196303404	197133038	829635	gain
13	199423047	200035720	612674	gain
14	788294	815391	27098	loss
14	18165664	19673910	1508247	gain
14	68202621	69492065	1289445	gain
14	82660183	83345531	685349	gain
14	92445913	96948372	4502460	gain
14	99595961	100697385	1101425	gain
14	123913845	124263551	349707	gain
14	127879250	128490257	611008	gain
15	678019	1282267	604249	gain
15	5433264	8700835	3267572	gain
15	11138747	13143206	2004460	gain
15	15518556	18848900	3330345	gain
15	20527835	22036974	1509140	gain
15	22134389	24130944	1996556	gain
15	25918412	26733738	815327	gain
15	35545677	35909428	363752	gain
15	38697331	41820944	3123614	both
15	46410703	47557396	1146694	gain
15	52924509	54667498	1742990	gain
15	67667725	71962360	4294636	gain
15	76813086	77694795	881710	gain
15	78998934	83971851	4972918	gain
15	89081188	93668318	4587131	gain
15	97821074	106038897	8217824	gain
15	112676848	116178967	3502120	gain
15	122842980	123521450	678471	gain
15	132929770	132963392	33623	gain
16	1586195	3001996	1415802	gain
16	15655447	19453476	3798030	gain
16	20033344	20099372	66029	loss
16	30387640	32246012	1858373	gain
16	51192764	53618906	2426143	gain
16	78512956	79365542	852587	gain
17	684949	3013297	2328349	gain
17	1791135	4717695	2926561	gain
17	11266924	11290809	23886	loss
17	12871752	13557912	686161	gain
17	15104500	15171323	66824	loss
17	15577540	17680444	2102905	gain
17	19225825	22703650	3477826	gain
17	37320510	39072547	1752038	gain
17	41430880	41459577	28698	loss
17	43316551	44228835	912285	gain
18	21470268	23538749	2068482	gain
18	24324905	27068376	2743472	gain
18	25885196	27888514	2003319	gain
18	28862230	29977561	1115332	gain
18	30074921	33160663	3085743	gain
18	31654911	33110417	1455507	gain
18	34811025	36278843	1467819	gain
